# Supplementary material for: Rapid synthesis and visible photoluminescence of ZnS nanobelts
Source: Royal Society of Chemistry journal article supplement (doi:10.1039/b412289e), 2004-11-29
Supplement: b412289e.pdf [file b412289e.pdf]

### Supporting Information:

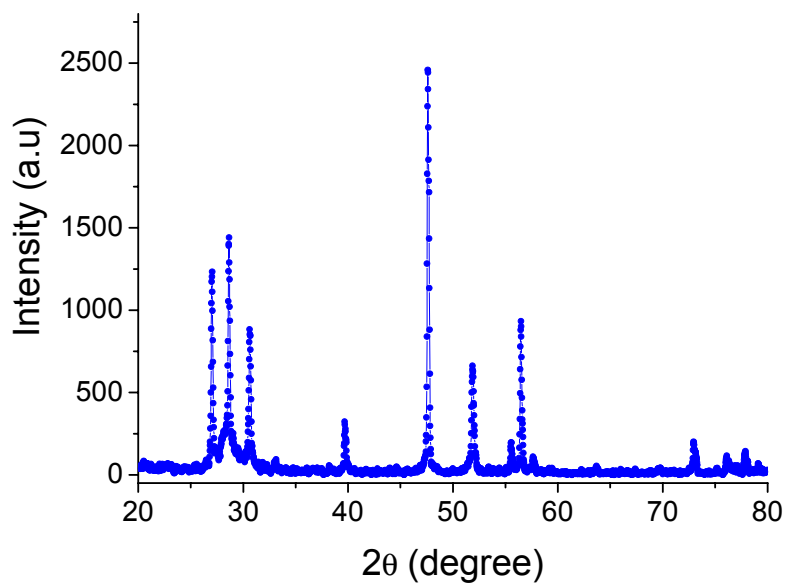

XRD of the ZnS nanobelt. It can be indexed to the wurtzite ZnS (JPCDS card 79-2204)

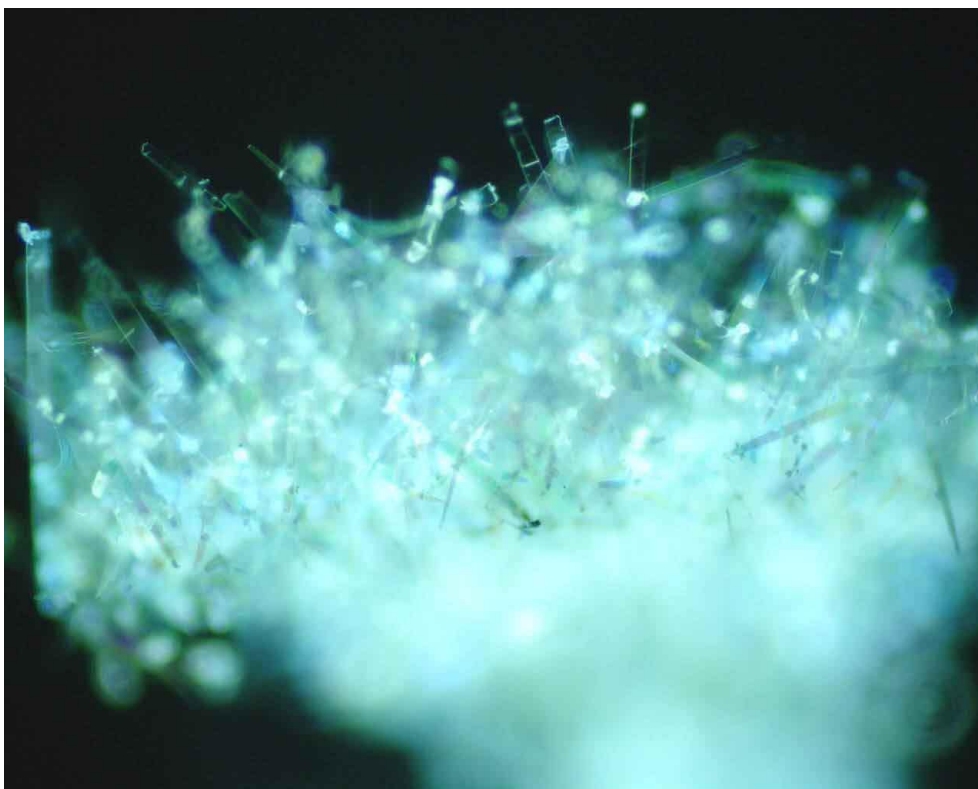

Photoluminescence microscopic image of the ZnS nanobelts under the excitation of 380 nm ultraviolet light.
